# Supplementary material for: Downregulation of the NLRP3 inflammasome by adiponectin rescues Duchenne muscular dystrophy
Source: PubMed Central journal article supplement (PMC5861675; doi:10.1186/s12915-018-0501-z), 2018-03-20

**Fig. S1. Comparison of NLRP3 quantified by Western blotting or immunostaining.** *Tibialis anterior* muscles were sampled from WT mice, Nlrp3-KO mice, mdx mice or mdx/Nlrp3-KO mice. NLRP3 protein was measured by using either Western blotting (like that shown on Fig.7) or immunostaining with subsequent measurement of DAB areas on muscle sections (like those shown on Fig.8). Data were expressed as percentages of WT values. As the signal was undetectable in KO mice, the correlation analysis using Pearson's test was performed only in non-KO mice (i.e. WT and mdx mice, n=12) from Fig. 7. There was a highly positive correlation between both techniques ( $r = 0.8982$ ,  $P < 0.0001$ ).

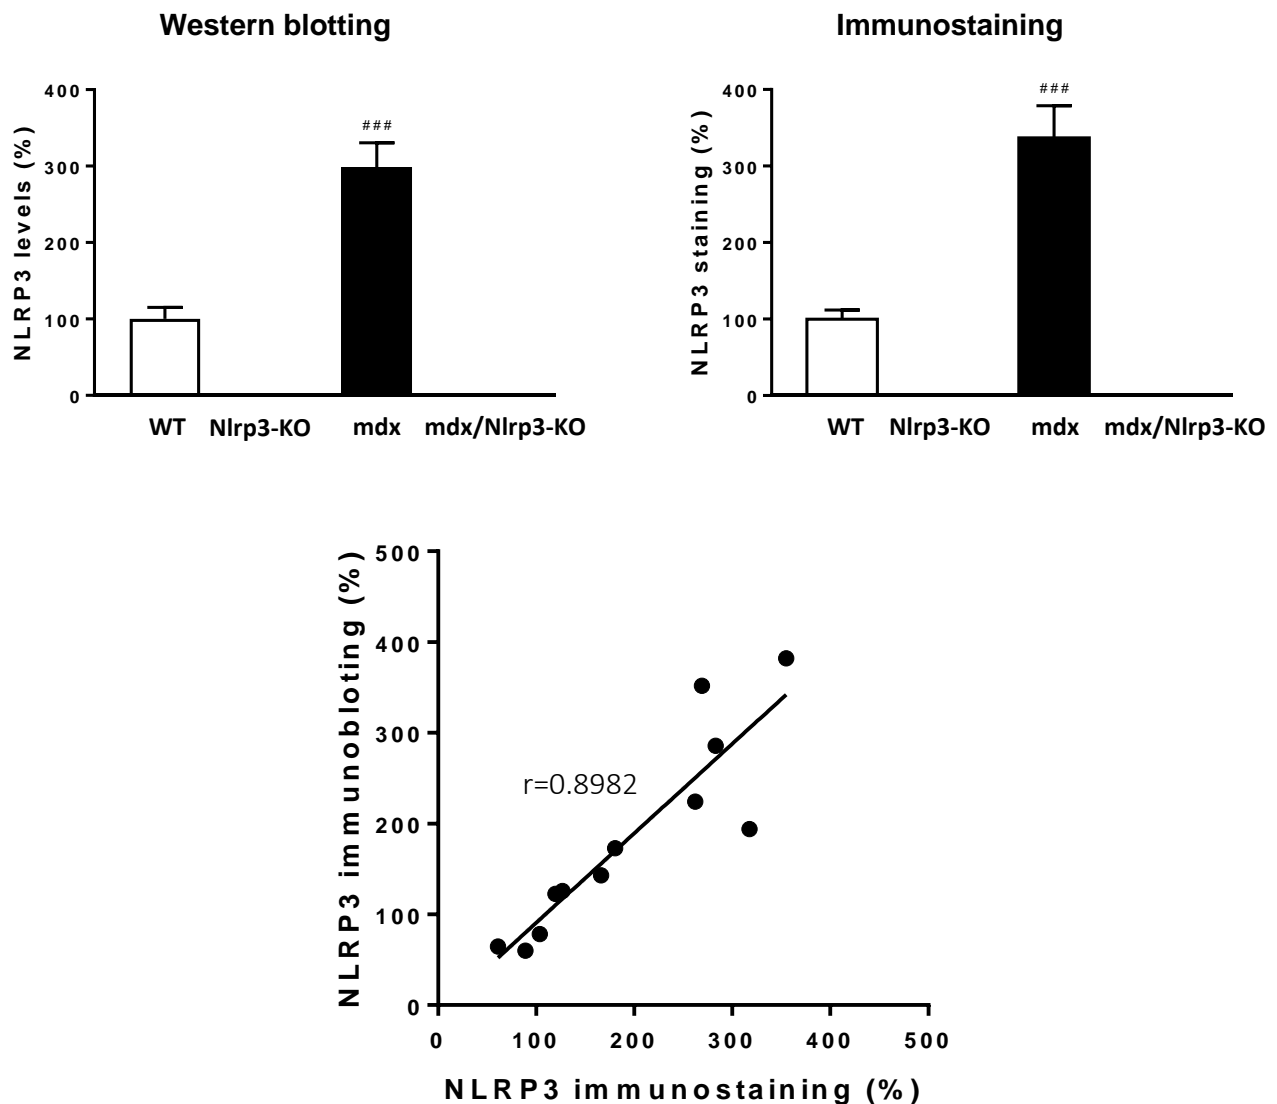

Supplement: 12915_2018_501_MOESM1_ESM.pdf [file 12915_2018_501_MOESM1_ESM.pdf]
