# Supplementary material for: Downregulation of the NLRP3 inflammasome by adiponectin rescues Duchenne muscular dystrophy
Source: PubMed Central journal article supplement (PMC5861675; doi:10.1186/s12915-018-0501-z), 2018-03-20
Supplement: 12915_2018_501_MOESM3_ESM.pdf [file 12915_2018_501_MOESM3_ESM.pdf]

**Supplementary Table 1: Gene sequences used as forward and reverse primers for RT-qPCR**

| <b>Gene</b>  | <b>Forward Primer</b>     | <b>Reverse Primer</b>     |
|--------------|---------------------------|---------------------------|
| <b>Mouse</b> |                           |                           |
| ASC          | AGACATGGGCTTACAGGAGCTG    | CCACAAAGTGTCTGTTCTGGC     |
| Caspase-1    | TACCTGGCAGGAATTCTGGAGC    | CAGTCAGTCCTGGAAATGTGCC    |
| IL-10        | GCATGGCCCAGAAATCAAGGAG    | TCACTCTTCACCTGCTCCACTG    |
| IL-18        | TGGCTGCCATGTCAGAAGACTC    | CTGCGGTTGTACAGTGAAGTCG    |
| IL-1 $\beta$ | GCTCTCCACCTCAATGGACAGA    | GCCCAAGGCCACAGGTATTTTG    |
| Nlrp3        | TCTGACCTCTGTGCTCAAAACCAAC | TGAGGTGAGGCTGCAGTTGTCTAAT |
| PRDX3        | GACATACTGTGGTCTGCCTCTG    | CCTTTAAAATAGGGCGCGTG      |
| TNF $\alpha$ | GCCACCACGCTCTTCTGTCT      | GTCTGGGCCATGGAAGTATG      |
| Cyclophilin  | AACCCACCGTGTTCTTC         | TGCCTTCTTTCACCTTCCC       |
| <b>Human</b> |                           |                           |
| FADD         | CCTGGGGAAGAAGACCTGTGTG    | TCGATGCTGTCGATCTTGGTGT    |
| NLRP3        | GCTTCGACATCTCCTTGGTCCT    | AGCTGACCAACCAGAGCTTCTT    |
| TNF $\alpha$ | CTCTTCTGCCTGCTGCACTTT     | GATGATCTGACTGCCTGGGC      |
| TOLLIP       | ATCACGGTGGTACAGGCAAAGT    | TATTCCAGCGGGGATTCTTGGC    |
| TBP          | CCCCATGACTCCCATGACCC      | ACGAAGTGCAATGGTCTTTAGGT   |
